# Supplementary material for: Oral Lesions and Oral Health-Related Quality of Life in Adult Patients with Psoriasis: A Retrospective Chart Review
Source: MDPI journal article supplement (doi:10.3390/life14030347), 2024-03-07
Supplement: s1 [file s1]

**Supplementary file 1 (S1) - Oral Health Impact Profile (OHIP-14) – Italian version.**

The Italian version of the questionnaire is based on a self-reported evaluation of the oral health-related quality of life through 14 questions (Oral Health Impact Profile – OHIP-14). The answers were based on a five-level rating scale.

- 1. HA AVUTO PROBLEMI NEL PRONUNCIARE PAROLE A CAUSA DI PROBLEMI CON DENTI, BOCCA, O PROTESI?**

☐ mai(=0) ☐ quasi mai (=1) ☐ qualche volta (=2) ☐ abbastanza spesso (=3) ☐ molto spesso (=4)

- 2. HA TROVATO CHE IL SUO SENSO DEL GUSTO FOSSE PEGGIORATO A CAUSA DI PROBLEMI CON DENTI, BOCCA, O PROTESI?**

☐ mai(=0) ☐ quasi mai (=1) ☐ qualche volta (=2) ☐ abbastanza spesso (=3) ☐ molto spesso (=4)

- 3. HA AVUTO DOLORI FASTIDIOSI IN BOCCA?**

☐ mai(=0) ☐ quasi mai (=1) ☐ qualche volta (=2) ☐ abbastanza spesso (=3) ☐ molto spesso (=4)

- 4. HA TROVATO DIFFICILE MANGIARE ALCUNI CIBI A CAUSA DI PROBLEMI CON DENTI, BOCCA, O PROTESI?**

☐ mai(=0) ☐ quasi mai (=1) ☐ qualche volta (=2) ☐ abbastanza spesso (=3) ☐ molto spesso (=4)

- 5. SI È SENTITO A DISAGIO DI FRONTE AGLI ALTRI A CAUSA DI PROBLEMI CON DENTI, BOCCA, O PROTESI?**

☐ mai(=0) ☐ quasi mai (=1) ☐ qualche volta (=2) ☐ abbastanza spesso (=3) ☐ molto spesso (=4)

- 6. SI È SENTITO TESO O NERVOSO A CAUSA DI PROBLEMI CON DENTI, BOCCA, O PROTESI?**

☐ mai(=0) ☐ quasi mai (=1) ☐ qualche volta (=2) ☐ abbastanza spesso (=3) ☐ molto spesso (=4)

- 7. LA SUA DIETA È STATA INSODDISFACENTE A CAUSA DI PROBLEMI CON DENTI, BOCCA, O PROTESI?**

☐ mai(=0) ☐ quasi mai (=1) ☐ qualche volta (=2) ☐ abbastanza spesso (=3) ☐ molto spesso (=4)

- 8. HA DOVUTO INTERROMPERE I PASTI A CAUSA DI PROBLEMI CON DENTI, BOCCA, O PROTESI?**

☐ mai(=0) ☐ quasi mai (=1) ☐ qualche volta (=2) ☐ abbastanza spesso (=3) ☐ molto spesso (=4)

**9. HA TROVATO DIFFICOLTÀ A RILASSARSI A CAUSA DI PROBLEMI CON DENTI, BOCCA, O PROTESI?**

☐ mai(=0) ☐ quasi mai (=1) ☐ qualche volta (=2) ☐ abbastanza spesso (=3) ☐ molto spesso (=4)

**10. SI È SENTITO UN PO'IMBARAZZATO A CAUSA DI PROBLEMI CON DENTI, BOCCA, O PROTESI?**

☐ mai(=0) ☐ quasi mai (=1) ☐ qualche volta (=2) ☐ abbastanza spesso (=3) ☐ molto spesso (=4)

**11. SI È SENTITO UN PO' IRRITABILE CON ALTRE PERSONE A CAUSA DI PROBLEMI CON DENTI, BOCCA, O PROTESI?**

☐ mai(=0) ☐ quasi mai (=1) ☐ qualche volta (=2) ☐ abbastanza spesso (=3) ☐ molto spesso (=4)

**12. HA AVUTO DIFFICOLTÀ A FARE I LAVORI USUALI A CAUSA DI PROBLEMI CON DENTI, BOCCA, O PROTESI?**

☐ mai(=0) ☐ quasi mai (=1) ☐ qualche volta (=2) ☐ abbastanza spesso (=3) ☐ molto spesso (=4)

**13. HA TROVATO CHE LA VITA IN GENERALE FOSSE MENO SODDISFACENTE A CAUSA DI PROBLEMI CON DENTI, BOCCA, O PROTESI?**

☐ mai(=0) ☐ quasi mai (=1) ☐ qualche volta (=2) ☐ abbastanza spesso (=3) ☐ molto spesso (=4)

**14. È STATO TOTALMENTE INCAPACE DI AGIRE O FARE COSE A CAUSA DI PROBLEMI CON DENTI, BOCCA, O PROTESI?**

☐ mai(=0) ☐ quasi mai (=1) ☐ qualche volta (=2) ☐ abbastanza spesso (=3) ☐ molto spesso (=4)
